# Supplementary material for: UV-light-assisted gas sensor based on PdSe2/InSe heterojunction for ppb-level NO2 sensing at room temperature
Source: Royal Society of Chemistry journal article supplement (doi:10.1039/d2nr03881a), 2022-01-01
Supplement: d2nr03881a1.pdf [file d2nr03881a1.pdf]

## Supporting Information

### **UV-light-assisted gas sensor based on PdSe<sub>2</sub>/InSe heterojunction for ppb-level NO<sub>2</sub> sensing at room temperature**

Jin-Le Fan <sup>a,b</sup>, Xue-Feng Hu <sup>a,b,\*</sup>, Wei-Wei Qin <sup>a,b</sup>, Zhi-Yuan Liu <sup>a,b</sup>, Yan-Song Liu <sup>a,b</sup>,  
Shou-Jing Gao <sup>a,b</sup>, Li-Ping Tan <sup>a,b</sup>, Ji-Lei Yang <sup>a,b</sup>, and Wei Zhang <sup>a,b,\*</sup>

<sup>a</sup> Anhui Province Key Laboratory of Measuring Theory and Precision Instrument,  
School of Instrument Science and Optoelectronics Engineering, Hefei University of  
Technology, Hefei 230009, Anhui, P. R. China

<sup>b</sup> Academy of Optoelectronic Technology, Special Display and Imaging Technology  
Innovation Center of Anhui Province, Hefei University of Technology, Hefei, Anhui  
Province, 230009, P. R. China

\*Corresponding authors: [xuefeng.hu@hfut.edu.cn](mailto:xuefeng.hu@hfut.edu.cn) (X. Hu) and [zhangw@hfut.edu.cn](mailto:zhangw@hfut.edu.cn) (W. Zhang)

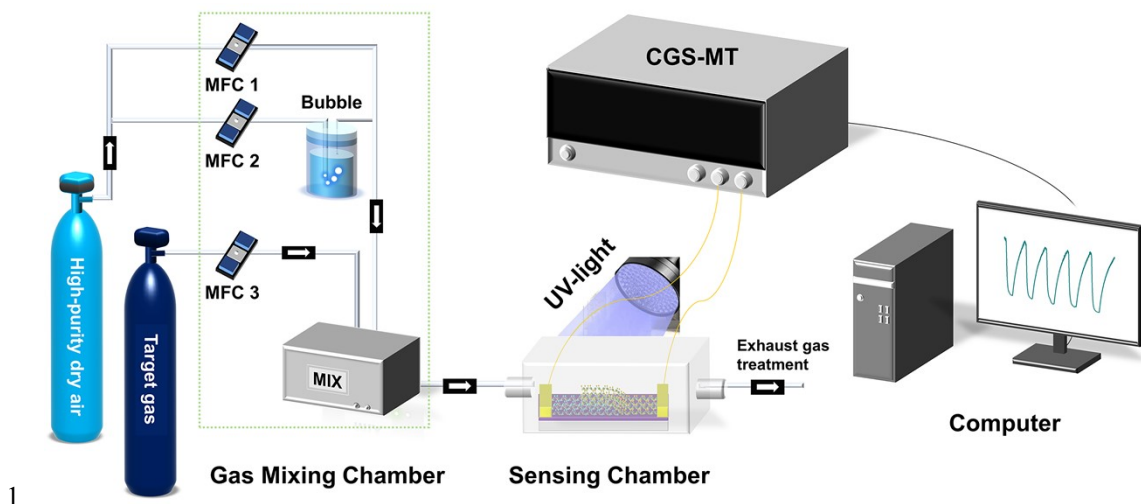

**Scheme S1.** Schematic diagram of the intelligent gas sensing platform (CGS-MT).

The room-temperature (25 °C) gas-sensing performance of this device was measured by an intelligent gas-sensing platform (CGS-MT, Elite Tech Co. Ltd, China) using high-purity dry air (HPDA) as background gas, as shown in Scheme S1. The sensing material was irradiated with 365 nm UV light and the intensity of UV light measured by the energy meter (Coherent FieldMaxII-TO) was about 0.6 mW/cm<sup>2</sup>. Note that all initial gases are in the standard 4 L cylinders with a purity larger than 99.9% before they are adjusted to a determined concentration. Then, the target gases were achieved by adjusting the ratio of target gases to the carrier gas (HPDA) via the self-controlled mass flow controllers (MFC), and the total flow rate of the gas mixture was 300

mL·min<sup>-1</sup>. According to the equation: 
$$C_1 = \frac{F_0}{F_0 + F_1} \cdot C_0$$
 (where  $C_1$  is the mixed target gas concentration,  $C_0$  is the standard gas concentration in the cylinder, and  $F_0$  and  $F_1$  are the flow rates of target gas and HPDA, respectively. The sum of  $F_0$  and  $F_1$  is 300 mL·min<sup>-1</sup>.), when  $C_0$  is 300 ppm NO<sub>2</sub>, and  $F_0$  and  $F_1$  are controlled to be 10 and 290 mL·min<sup>-1</sup>, respectively,  $C_1$  is expected to be 10 ppm. The other NO<sub>2</sub> gases with concentrations of 0.1 ppm, 0.5 ppm, 1 ppm, 3 ppm, 5 ppm, and 20 ppm and the other gases of 10 ppm NO, NH<sub>3</sub>, H<sub>2</sub>, CO, and ethanol were obtained in the same way.

Note that in the study of the effect of humidity toward NO<sub>2</sub>, the dry air was divided into two ways, and one way was fed into the bubble to get humidity gas. Then, the

- 1 stable relative humidity (RH) values were obtained by adjusting the mass flow ratios of
- 2 dry and humidity gases in RH experiments.

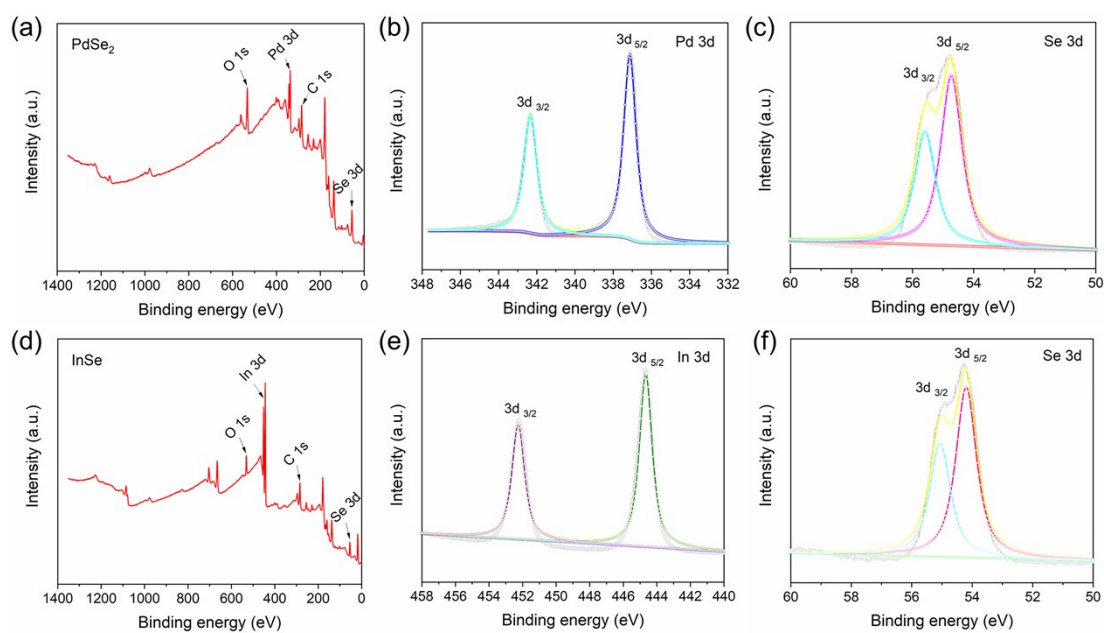

1  
2 **Fig. S1** XPS spectra. (a-c) Survey, Pd 3d, and Se 3d spectrums of the PdSe<sub>2</sub> film,  
3 respectively. (d-f) Survey, In 3d, and Se 3d spectrums of the InSe film, respectively.  
4

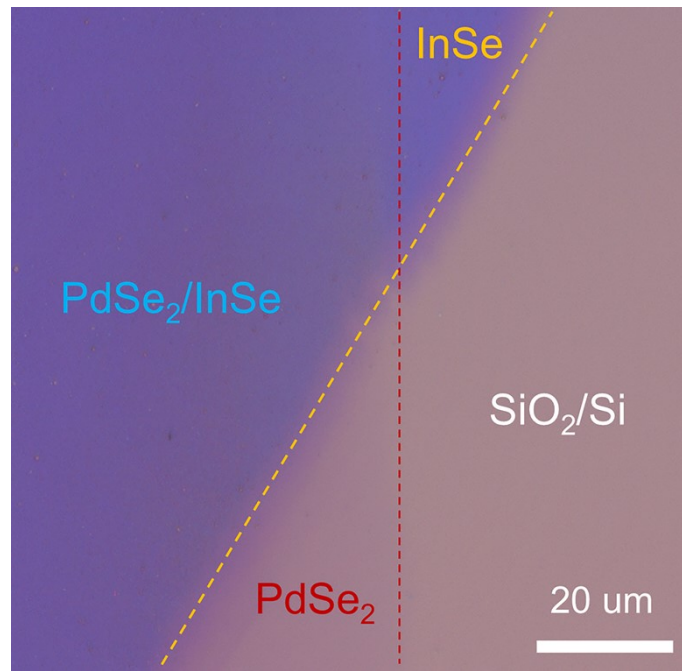

1

2 **Fig. S2** Optical image of the stacked  $\text{PdSe}_2/\text{InSe}$  heterojunction in three different  
3 regions of the  $\text{PdSe}_2$ ,  $\text{InSe}$ , and  $\text{PdSe}_2/\text{InSe}$ .

4

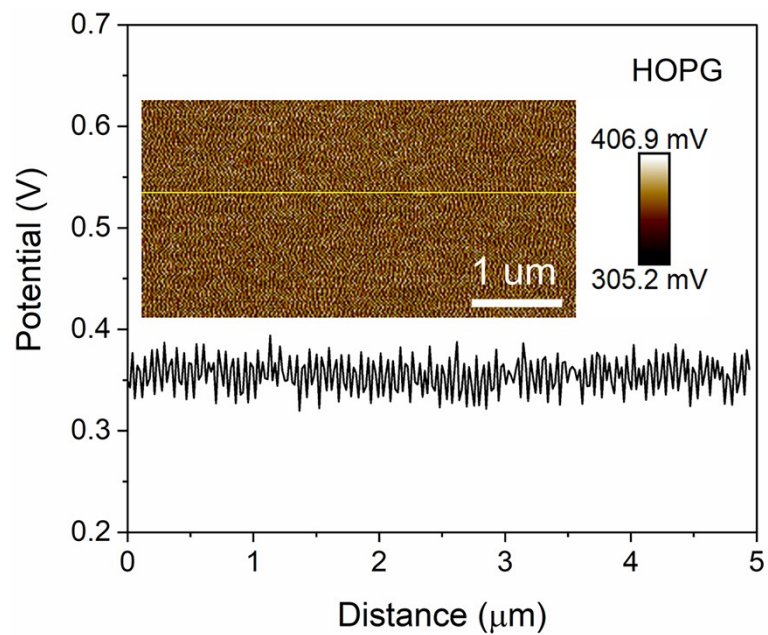

1

2 **Fig. S3** By scanning a standard HOPG sample with a known work function of 4.6 eV,

3 the  $V_{CPD}$  of HOPG was 0.37 V, and then  $W_{tip}$  was calculated to be 4.97 eV.

4

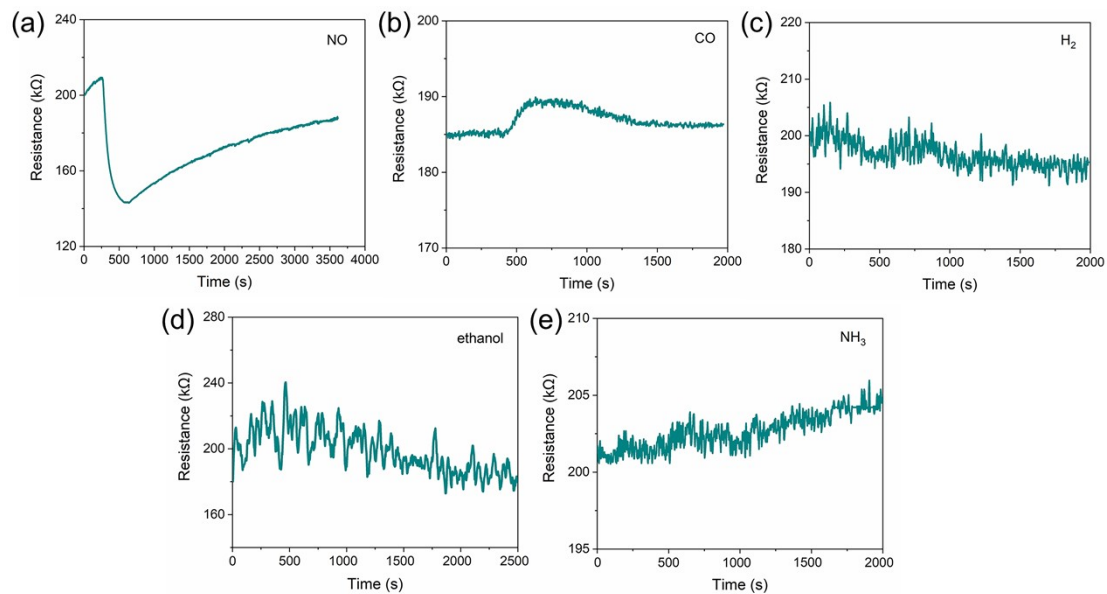

1

2 **Fig. S4** The selectivity of the sensor based on PdSe<sub>2</sub>/InSe heterojunction toward 10  
 3 ppm different gases of (a) NO, (b) CO, (c) H<sub>2</sub>, (d) ethanol and (e) NH<sub>3</sub>.

4

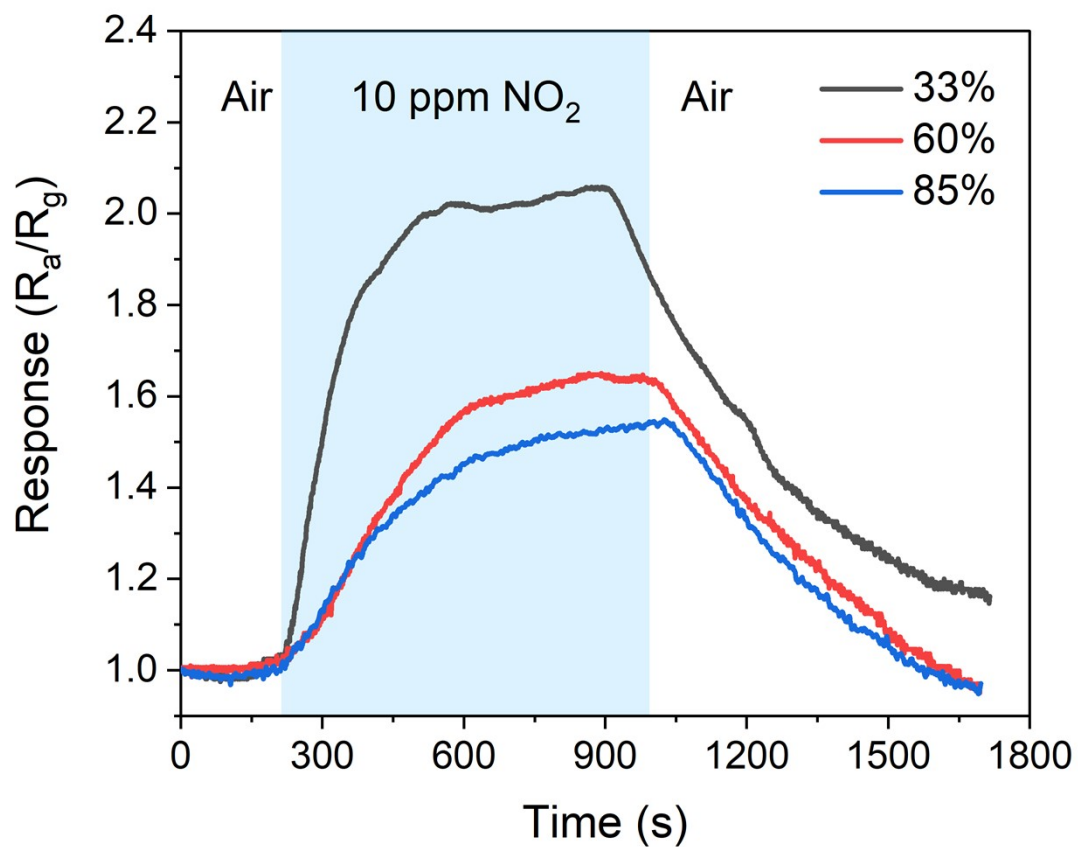

1

2 **Fig. S5** Responses of the PdSe<sub>2</sub>/InSe heterojunction sensor toward 10 ppm NO<sub>2</sub> at  
 3 different relative humidity.
